# Supplementary material for: An up-conversion Ba3In(PO4)3:Er3+/Yb3+ phosphor that enables multi-mode temperature measurements and wide-gamut ‘temperature mapping’
Source: Royal Society of Chemistry journal article supplement (doi:10.1039/d3dt01575k), 2023-01-01
Supplement: d3dt01575k1.pdf [file d3dt01575k1.pdf]

# Supporting Information

## **An up-conversion $\text{Ba}_3\text{In}(\text{PO}_4)_3$ : $\text{Er}^{3+}/\text{Yb}^{3+}$ phosphor enabling multi-mode temperature measurements and wide-gamut ‘temperature mapping’**

Zonghao Lei<sup>1</sup>, Ronghui Liu<sup>1</sup>, Lijie Sun<sup>1</sup>, Xiaoxiong Wang<sup>1</sup>, Chen Hu<sup>1</sup>, Yanfei Zou<sup>1</sup>, Xiaowei Yang<sup>1</sup>, Shikun Su<sup>1</sup>, Bing Teng<sup>1,2,3\*</sup>, Hui Xu<sup>4</sup>, Degao Zhong<sup>1,2,3\*</sup>

<sup>1</sup>College of Physics, University-Industry Joint Center for Ocean Observation and Broadband Communication, Qingdao University, Qingdao 266071, China

<sup>2</sup>National Demonstration Center for Experiment Applied Physics Education (Qingdao University), Qingdao 266071, China

<sup>3</sup> Weihai Innovation Research Institute of Qingdao University, Weihai 264200, China

<sup>4</sup> CRYSTECH Inc., Qingdao, 266107, China

\*Corresponding author. Email: [zhdg2008@126.com](mailto:zhdg2008@126.com) (Degao Zhong), [5108tb@163.com](mailto:5108tb@163.com) (Bing Teng)

**Table S1. Atomic mass and quantity percentage of Ba<sub>3</sub>In(PO<sub>4</sub>)<sub>3</sub>: 0.02Er<sup>3+</sup>/0.05Yb<sup>3+</sup>**

| Element | Line type | wt%   | wt% Sigma | Atomic percentage |
|---------|-----------|-------|-----------|-------------------|
| O       | K         | 23.89 | 0.21      | 63.60             |
| P       | K         | 11.42 | 0.11      | 15.70             |
| In      | L         | 12.02 | 0.15      | 4.46              |
| Ba      | L         | 51.19 | 0.26      | 15.87             |
| Er      | L         | 0.27  | 0.19      | 0.07              |
| Yb      | L         | 1.21  | 0.22      | 0.30              |

**Table S2. Atomic coordinates of Ba<sub>3</sub>In(PO<sub>4</sub>)<sub>3</sub>: 0.02Er<sup>3+</sup>/0.05Yb<sup>3+</sup>**

| Atom | x       | y       | z       |
|------|---------|---------|---------|
| Ba1  | 0.06050 | 0.06050 | 0.06050 |
| P1   | 0.37500 | 0.00000 | 0.25000 |
| O1   | 0.29628 | 0.92880 | 0.34419 |
| O2   | 0.29471 | 0.02760 | 0.37926 |
| In1  | 0.08210 | 0.08210 | 0.08210 |
| Er1  | 0.08194 | 0.08194 | 0.08194 |
| Yb1  | 0.08222 | 0.08222 | 0.08222 |

**Table S3. Dependence of emission intensity on pumping density**

| Yb <sup>3+</sup> Concentration | 523nm  | 545nm  | 658nm  |
|--------------------------------|--------|--------|--------|
| 5                              | 1.5340 | 1.3836 | 1.1096 |
| 20                             | 1.7952 | 1.4686 | 1.0835 |
| 40                             | 1.7463 | 1.3309 | 1.0058 |
| 60                             | 1.7218 | 1.2280 | 1.1114 |
| 80                             | 1.8698 | 1.3452 | 1.0302 |
| 98                             | 1.9948 | 1.4574 | 1.0962 |

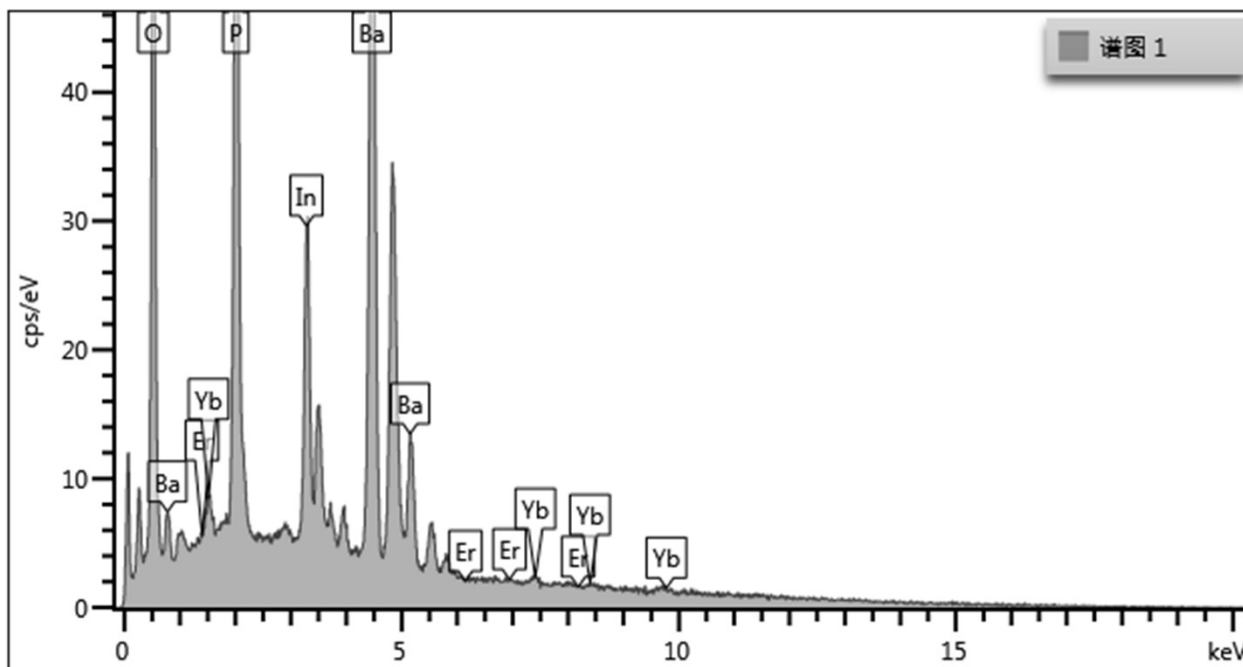

**Fig. S1.** EDS analysis of Ba<sub>3</sub>In(PO<sub>4</sub>)<sub>3</sub>: 0.02Er<sup>3+</sup>/0.05Yb<sup>3+</sup> single phase powders.

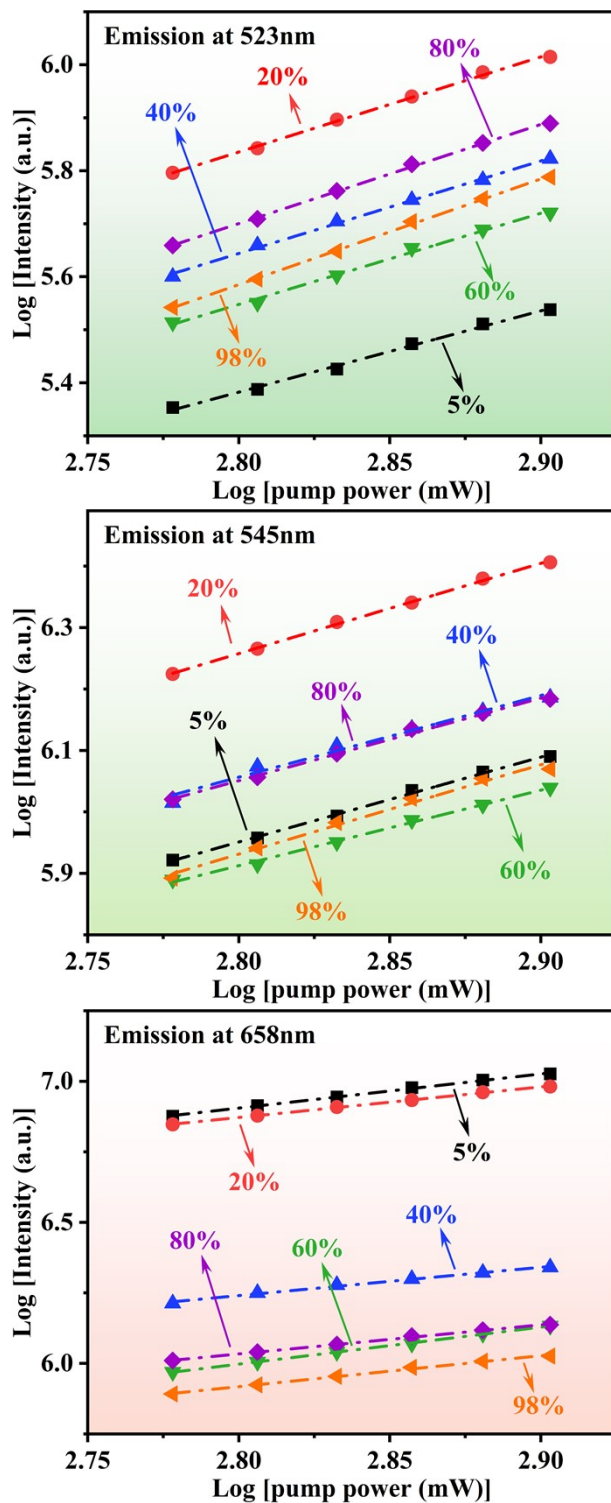

**Fig. S2.** Double logarithmic relationship of 523nm, 545nm and 658nm UC intensities versus power density of  $\text{Ba}_3\text{In}(\text{PO}_4)_3: \text{Er}^{3+}/\text{Yb}^{3+}$  with different doping concentrations.

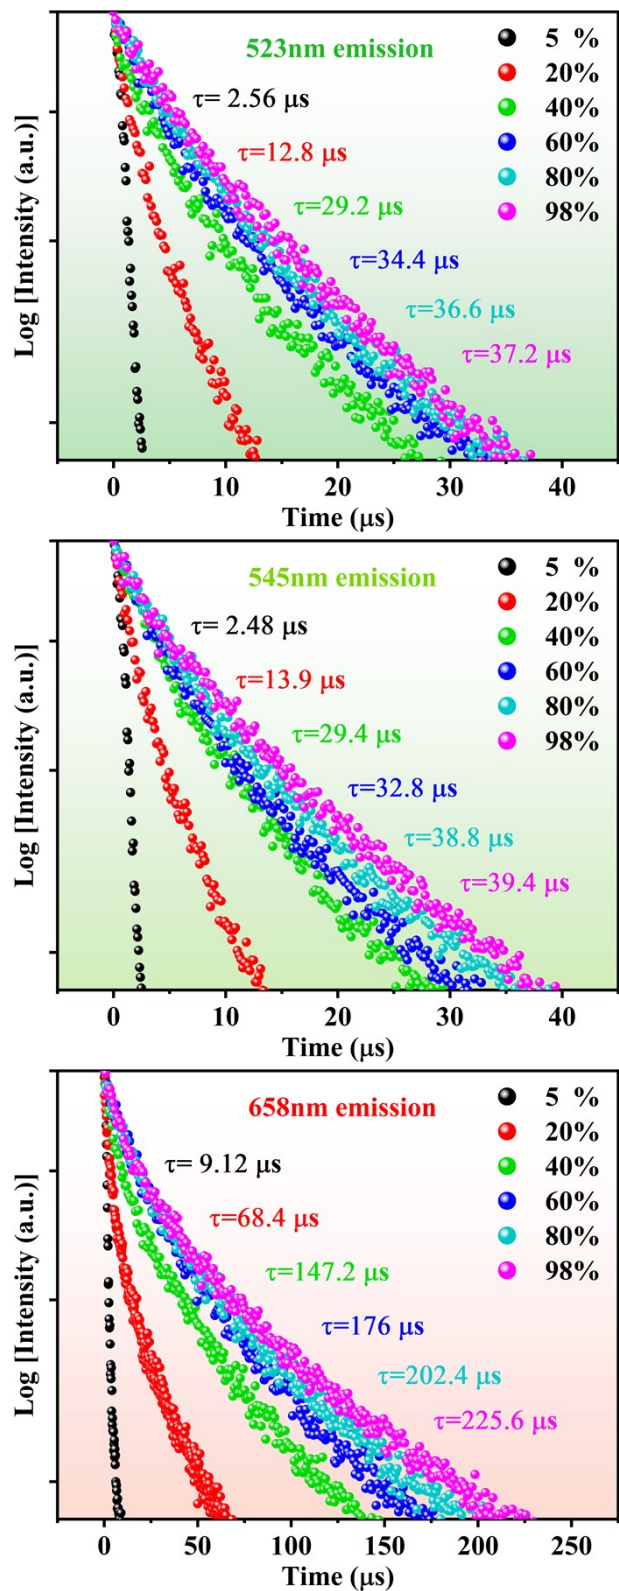

**Fig. S3.** Fluorescence decay curve of 523nm, 545nm and 658nm of  $\text{Ba}_3\text{In}(\text{PO}_4)_3: \text{Er}^{3+}/\text{Yb}^{3+}$  with different doping concentrations.

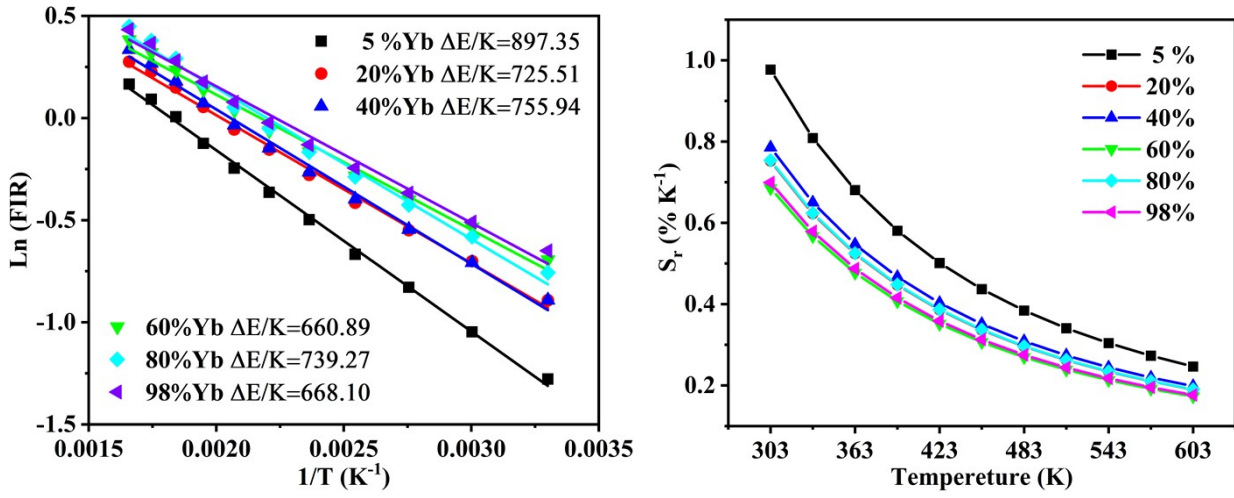

**Fig. S4.** Comparison of FIR and  $S_r$  values of samples with different  $\text{Yb}^{3+}$  doping concentrations.
